# Supplementary material for: Achieving High Expression of Cry in Green Tissues and Negligible Expression in Endosperm Simultaneously via rbcS Gene Fusion Strategy in Rice
Source: MDPI journal article supplement (doi:10.3390/ijms24109045), 2023-05-20
Supplement: s1 [file s1]

**Table S1 Content of Cry1Ab/Cry1Ac in rice seeds by ELISA assay**

| <b>Line</b> | <b>Brown rice</b>   | <b>Endosperm</b>    |
|-------------|---------------------|---------------------|
| NT          | 0.000037±0.000033   | 0.000053±0.000024   |
| RRC-1       | 0.014587±0.000565** | 0.000693±0.000103** |
| RRC-2       | 0.019605±0.000381** | 0.000955±0.000168** |
| RRC-3       | 0.010037±0.000145** | 0.001173±0.000164** |
| RRC-11      | 0.025013±0.000420** | 0.000464±0.000073** |
| RRC-12      | 0.005701±0.000033** | 0.000117±0.000009   |
| T51-1       | 1.040330±0.060377** | 0.305228±0.027174** |

All data were measured from 10 randomly sampled plants per test material per replication (3 replications) and were analysed by the Tukey's multiple comparisons test using the GraphPad Prism 8 software package. Values are given as the mean±standard deviation (SD). NT as the negative control; All of the others lines were compared with the NT. \* and \*\* meant significantly different from the control at P <0.05 and P<0.01, respectively.
