# Supplementary material for: Achieving High Expression of Cry in Green Tissues and Negligible Expression in Endosperm Simultaneously via rbcS Gene Fusion Strategy in Rice
Source: Int J Mol Sci. 2023 May 20;24(10):9045. doi: 10.3390/ijms24109045 (PMC10218938; doi:10.3390/ijms24109045)
Supplement: Supplementary file 1 [file ijms-24-09045-s001.zip › Table S2.xlsx]

## Sheet: Sheet1
	Table S2 Primer List
	Primer Name	Sequence（5' to 3'）
	For qRT-PCR
	eYFP-qRT-PCR-F	TTCAAGTCCGCCATGCCCGAA
	eYFP-qRT-PCR-R	TTGCCGTCCTCCTTGAAGTCG
	Actin-qRT-PCR-F	TGGCATCTCTCAGCACATTCC
	Actin-qRT-PCR-R	TGCACAATGGATGGGCCAGA
	For Southern blot
	Bt-SB-F	AGGCTGATTGGAAACTACACCGAC
	Bt-SB-R	ACAGCGGATGGCAAGTTAGAAGAG
	For positive tests of transgenic plants
	eYFP-F	CTACCCCGACCACATGAAGC
	eYFP-R	CGCTTCTCGTTGGGGTCTTT
	Bt-F	GGCCATACAACTGCTTGAGT
	Bt-R	GCGTTTCCCATAGTTCCATA
	HPT-F	TTGGGAATCCCCGAACATCG
	HPT-R	TGACCTATTGCATCTCCCGC
